# Supplementary material
Source: Research Square preprint supplement (doi:10.21203/rs.3.rs-9340796/v1)
Supplement: Supplementary file 1 [file bce61478bd10a849521b3a32.xlsx]

## Sheet: Table S1
Table S1. List taxa including in analysis
Species	Assession number
Paeonia ostii	NC_036834.1
Paeonia rockii	OK235337.1
Paeonia jishanensis	NC_050330.1
Paeonia qiui	NC_050333.1
Paeonia decomposita	NC_039425.1
Paeonia ludlowii	OR187762.1
Paeonia delavayi	MN463100.1
Paeonia suffruticosa 'Luo Yang Hong'	MK701995.1
Paeonia suffruticosa 'Cao Zhou Hong'	ON227528.1
Paeonia suffruticosa 'Yao Huang'	ON227529.1
Paeonia suffruticosa 'Dou Lv'	MK701994.1
Paeonia baokangensis	MK701993.1
Paeonia Itoh	OQ161285.1
Paeonia veitchii	MW762596.1
Paeonia sterniana	NC_071222.1

## Sheet: Table S2
Table S2. Characteristics of Paeonia suffruticosa 'Cun Song Ying' chloroplast genome
Characteristics	Number
Total length (bp)	152704
Length of Large single-copy (LSC)region (bp)	84365
Length of Small single-copy (SSC)region (bp)	17046
Length of inverted repeat (IR)(bp)	25645
Total GC contents (%)	38.38
No. of protein coding genes	91
No. of tRNA genes	39
No. of rRNA genes	8
No. of unique genes	138

## Sheet: Table S3
Table S3. Characteristics of Paeonia suffruticosa 'Cun Song Ying' chloroplast genome
Category	Gene Group	Gene Name	Number
Photosynthesis	Subunits of photosystem I	psaB, psaA, psaI, psaJ, psaC	5
	Subunits of photosystem II	psbA, psbK, psbI, psbM, psbD, psbC, psbZ, psbJ, psbL, psbF, psbE, psbB, psbT, psbN, psbH	15
	Subunits of NADH dehydrogenase	ndhJ, ndhK, ndhC, ndhB(2)#, ndhF, ndhD, ndhE, ndhG, ndhI, ndhA#, ndhH	12
	Subunits of cytochrome b/f complex	petN, petA, petL, petG, petB#, petD#	6
	Large subunit of rubisco	rbcL	1
	Subunits of ATP synthase	atpA, atpF#, atpH, atpI, atpE, atpB	6
Self-replication	Proteins of large ribosomal subunit	rpl33, rpl20, rpl36, rpl14, rpl16#, rpl22, rpl2(2)#, rpl23(2)	10
	Proteins of small ribosomal subunit	rps12(2)##, rps16#, rps2, rps14, rps4, rps18, rps11, rps8, rps3, rps19, rps7(2), rps15	14
	Subunits of RNA polymerase	rpoC2, rpoC1#, rpoB, rpoA	4
	Ribosomal RNAs	rrn16(2), rrn23(2), rrn45(2), rrn5(2)	8
	Transfer RNAs	trnH-GUG, trnK-UUU#, trnQ-UUG, trnS-GCU, trnR-UCU, trnC-GCA, trnD-GUC, trnY-GUA, trnE-UUC, trnT-GGU(2), trnM-CAU(2), trnS-UGA, trnG-UCC, trnfM-CAU, trnS-GGA, trnT-UGU, trnL-UAA#, trnF-GAA, trnV-UAC#, trnW-CCA, trnP-UGG, trnP-GGG, trnI-CAU(2), trnL-CAA(2), trnV-GAC(2), trnI-GAU(2)#, trnA-UGC(2)#, trnR-ACG(2), trnN-GUU(2), trnL-UAG	39
Other genes	Maturase	matK	1
	Protease	clpP##	1
	Envelope membrane protein	cemA	1
	Acetyl-CoA carboxylase	accD	1
	c-type cytochrome synthesis gene	ccsA	1
	Translation initiation factor	infA	1
	Conserved open reading frames	ycf3##, ycf4, ycf2(2), ycf15(2), ycf68(2), ycf1	9
	ORFs	orf42(2), orf188	3
Total			138
#: Intron number, (n): Gene copy number

## Sheet: Table S4
Table S4. Paeonia suffruticosa 'Cun Song Ying' repeat type statistics
species	Forward	Palindromic	Reveres
Paeonia Itoh	21	23	0
Paeonia baokangensis	21	22	1
Paeonia decomposita	21	23	0
Paeonia delavayi	21	21	2
Paeonia jishanensis	23	23	0
Paeonia ludlowii	19	11	1
Paeonia ostii	22	23	0
Paeonia qiui	21	10	1
Paeonia rockii	21	20	0
Paeonia sterniana	20	19	2
Paeonia suffruticosa Cao Zhou Hong	20	22	0
Paeonia suffruticosa Cun Song Ying	22	21	0
Paeonia suffruticosa Dou Lv	20	21	0
Paeonia suffruticosa Luo Yang Hong	21	22	0
Paeonia suffruticosa Yao Huang	20	21	0
Paeonia veitchii	18	19	0

## Sheet: Table S5
Table S5. SSR statistic of Paeonia suffruticosa 'Cun Song Ying'
Repeats	Paeonia baokangensis	Paeonia decomposita	Paeonia delavayi	Paeonia Itoh	Paeonia jishanensis	Paeonia ludlowii	Paeonia ostii	Paeonia qiui	Paeonia rockii	Paeonia sterniana	Paeonia suffruticosa Cao Zhou Hong	Paeonia suffruticosa Cun Song Ying	Paeonia suffruticosa Dou Lv	Paeonia suffruticosa Luo Yang Hong	Paeonia suffruticosa Yao Huang	Paeonia veitchii
A	21	19	18	17	22	20	18	21	19	16	18	20	17	20	17	13
G	2	1	0	3	2	0	0	2	0	0	3	4	2	3	3	0
T	25	23	23	23	25	22	23	25	23	18	22	24	23	23	23	22
AT	7	7	7	7	8	7	9	7	8	6	7	7	7	7	7	7
TA	4	4	4	4	4	4	4	4	4	4	4	4	4	4	4	3
TC	1	1	1	1	1	1	1	1	1	1	1	1	1	1	1	1
AAT	2	2	0	1	2	1	1	2	1	1	1	2	1	2	1	2
ATA	2	2	2	3	2	2	2	2	2	2	3	2	3	2	3	2
TAA	1	1	1	1	1	1	1	1	2	1	1	1	1	1	1	1
TAT	1	1	1	1	1	1	1	1	1	1	1	1	1	1	1	1
TTA	1	1	0	1	1	0	1	1	1	1	1	1	1	1	1	1
AAAC	1	1	1	1	1	1	1	1	1	1	1	1	1	1	1	1
AAAT	1	1	1	1	1	1	1	1	1	1	1	1	1	1	1	1
ATCT	1	1	1	1	1	1	1	1	1	1	1	1	1	1	1	1
CTTT	1	1	0	1	1	0	1	1	1	0	1	1	1	1	1	0
TTTA	1	1	1	1	1	1	1	1	1	1	1	1	1	1	1	1
C	0	1	1	1	0	1	1	1	0	0	1	1	1	1	1	0
ACATT	0	0	1	0	0	0	0	0	0	0	0	0	0	0	0	0
TATAA	0	0	0	0	1	0	0	0	0	0	0	0	0	0	0	0
AAAG	0	0	0	0	0	0	1	0	1	0	0	0	0	0	0	0
Sum	72	68	63	68	75	64	68	73	68	55	68	73	67	71	68	57

## Sheet: Table S6
Table S6. Codon statistic of Paeonia suffruticosa 'Cun Song Ying'
Amino Acid	AA Count	AA Freq	Codon	Codon Count	Codon Freq
Ala	1332	0.0548	GCA	351	0.0144
			GCC	238	0.0098
			GCG	167	0.0069
			GCU	576	0.0237
Arg	1455	0.0599	AGA	413	0.017
			AGG	165	0.0068
			CGA	315	0.013
			CGC	120	0.0049
			CGG	134	0.0055
			CGU	308	0.0127
Asn	1178	0.0485	AAC	258	0.0106
			AAU	920	0.0379
Asp	1023	0.0421	GAC	209	0.0086
			GAU	814	0.0335
Cys	273	0.0112	UGC	71	0.0029
			UGU	202	0.0083
Gln	869	0.0358	CAA	657	0.027
			CAG	212	0.0087
Glu	1266	0.0521	GAA	940	0.0387
			GAG	326	0.0134
Gly	1701	0.07	GGA	648	0.0267
			GGC	205	0.0084
			GGG	325	0.0134
			GGU	523	0.0215
His	580	0.0239	CAC	132	0.0054
			CAU	448	0.0184
Ile	2097	0.0863	AUA	645	0.0265
			AUC	441	0.0182
			AUU	1011	0.0416
Leu	2521	0.1038	CUA	355	0.0146
			CUC	171	0.007
			CUG	166	0.0068
			CUU	548	0.0226
			UUA	785	0.0323
			UUG	496	0.0204
Lys	1273	0.0524	AAA	948	0.039
			AAG	325	0.0134
Met	558	0.023	AUG	558	0.023
Phe	1370	0.0564	UUC	502	0.0207
			UUU	868	0.0357
Pro	1038	0.0427	CCA	281	0.0116
			CCC	210	0.0086
			CCG	164	0.0067
			CCU	383	0.0158
Ser	1866	0.0768	AGC	123	0.0051
			AGU	354	0.0146
			UCA	368	0.0151
			UCC	326	0.0134
			UCG	191	0.0079
			UCU	504	0.0207
TER	57	0.0023	UAA	30	0.0012
			UAG	14	0.0006
			UGA	13	0.0005
Thr	1216	0.05	ACA	374	0.0154
			ACC	234	0.0096
			ACG	142	0.0058
			ACU	466	0.0192
Trp	437	0.018	UGG	437	0.018
Tyr	904	0.0372	UAC	170	0.007
			UAU	734	0.0302
Val	1283	0.0528	GUA	489	0.0201
			GUC	144	0.0059
			GUG	189	0.0078
			GUU	461	0.019
